# Supplementary material for: Exploring the role of Artificial Intelligence in Bariatric and Metabolic Surgery
Source: Research Square preprint supplement (doi:10.21203/rs.3.rs-8427770/v1), 2026-01-20
Supplement: Supplementary file 1 [file ea2ec58f8a1fbe621504e108.docx]

**Supplementary Material 1. List of collaborators**

The authors thank the expert bariatric and metabolic surgeons who participated in the evaluation of the clinical scenarios and provided their expert recommendations:

Andrei Coria, Antonio Giovanni Spaventa Ibarrola, Azucena Reyes Pérez, Carlos Alberto Gutiérrez Rojas, Carlos González de Cosío Corredor, Carlos Valenzuela Salazar, Carlos Zerrweck López, Diana Gabriela Maldonado Pintado, Eduardo Jaramillo, Eduardo Vidrio Duarte, Ernesto Paez, Gilberto Ungson, Guillemo Ponce de León Ballesteros, Iliana González Pezzat, Israel Augusto González González, Itzel Fernández, Jesús Morales Maza, Juan Carlos Ramírez Almaral, Juan Francisco Arellano, Karla Carolina Flores Maciel, Lizbeth Guilbert, Luis Zorrilla, Luis Zurita Macías Valadez, Manuel Aceves Ávalos, Martha Patricia Sánchez Muñoz, Melba Rivera Félix, Miguel Ángel Zapata, Noé Nuñez Jasso, Roberto Estrada, Sergio Verboonen.

**Supplementary Material 2. Simulated Clinical Scenarios**

The following section presents ten brief simulated clinical scenarios. Based on the provided clinical information and current evidence-based literature, participants were asked to select the most appropriate bariatric or metabolic surgical procedure for each case, considering associated comorbidities and procedural risks.
For each scenario, predefined surgical options were provided.

### Case 1

A 38-year-old woman with a weight of 88 kg, height of 1.54 m, and a body mass index (BMI) of 37 kg/m². She is a non-smoker and has no associated comorbidities. She achieved a weight loss of 6 kg over six months with medical treatment, reaching a current BMI of 34.6 kg/m². She is seeking additional treatment options and fully understands and accepts the postoperative requirements of bariatric procedures. She has no contraindications to surgery and no financial limitations.

**Which surgical procedure would you recommend?**

☐ Not a candidate for surgery
☐ Sleeve gastrectomy
☐ Roux-en-Y gastric bypass
☐ One-anastomosis gastric bypass
☐ Biliopancreatic diversion with duodenal switch
☐ SADI-S
☐ Intestinal transit bipartition
☐ Other (specify): _______________________

### **Case 2**

A 49-year-old woman weighing 120 kg, height 1.64 m, BMI 44.6 kg/m², non-smoker, with type 2 diabetes mellitus of three years’ duration. Her primary goal is diabetes remission. She understands and accepts the postoperative requirements of all procedures and has no contraindications or financial limitations.

**Which surgical procedure would you recommend?**

☐ Not a candidate for surgery
☐ Sleeve gastrectomy
☐ Roux-en-Y gastric bypass
☐ One-anastomosis gastric bypass
☐ Biliopancreatic diversion with duodenal switch
☐ SADI-S
☐ Intestinal transit bipartition
☐ Other (specify): _______________________

### **Case 3**

A 45-year-old man weighing 120 kg, height 1.75 m, BMI 39.1 kg/m², non-smoker, without diabetes, but with a five-year history of systemic arterial hypertension. He previously failed medical weight-loss therapy and is concerned about cardiovascular risk. He has no contraindications to surgery and no financial limitations.

**Which surgical procedure would you recommend?**

☐ Not a candidate for surgery
☐ Sleeve gastrectomy
☐ Roux-en-Y gastric bypass
☐ One-anastomosis gastric bypass
☐ Biliopancreatic diversion with duodenal switch
☐ SADI-S
☐ Intestinal transit bipartition
☐ Other (specify): _______________________

### **Case 4**

A 65-year-old man weighing 125 kg, height 1.70 m, BMI 42 kg/m², non-smoker, with type 2 diabetes mellitus of four years’ duration controlled with metformin and dyslipidemia (total cholesterol 230 mg/dL). His primary concern is cardiovascular risk related to dyslipidemia. He has no contraindications to surgery or financial limitations.

**Which surgical procedure would you recommend?**

☐ Not a candidate for surgery
☐ Sleeve gastrectomy
☐ Roux-en-Y gastric bypass
☐ One-anastomosis gastric bypass
☐ Biliopancreatic diversion with duodenal switch
☐ SADI-S
☐ Intestinal transit bipartition
☐ Other (specify): _______________________

### **Case 5**

A 38-year-old woman weighing 110 kg, height 1.60 m, BMI 42.9 kg/m², non-smoker, with pathological esophageal acid exposure documented by pH monitoring and Los Angeles grade C esophagitis on endoscopy. A 3-cm hiatal hernia is present. She understands and accepts all postoperative requirements and has no contraindications or financial limitations.

**Which surgical procedure would you recommend?**

☐ Not a candidate for surgery
☐ Sleeve gastrectomy
☐ Roux-en-Y gastric bypass
☐ One-anastomosis gastric bypass
☐ Biliopancreatic diversion with duodenal switch
☐ SADI-S
☐ Intestinal transit bipartition
☐ Other (specify): _______________________

### **Case 6**

A 44-year-old woman weighing 132 kg, height 1.62 m, BMI 50.2 kg/m², non-smoker, with metabolic dysfunction–associated steatohepatitis (MASH). Her main concern is obesity-related liver disease. She has no contraindications to surgery or financial limitations.

**Which surgical procedure would you recommend?**

☐ Not a candidate for surgery
☐ Sleeve gastrectomy
☐ Roux-en-Y gastric bypass
☐ One-anastomosis gastric bypass
☐ Biliopancreatic diversion with duodenal switch
☐ SADI-S
☐ Intestinal transit bipartition
☐ Other (specify): _______________________

### **Case 7**

A 34-year-old woman with 20 years of grade II obesity, weighing 80 kg, height 1.45 m, BMI 38.0 kg/m², non-smoker, with type 2 diabetes mellitus and systemic arterial hypertension under adequate control. She has experienced functional deterioration related to a depressive disorder currently controlled with pharmacologic therapy. She has no contraindications or financial limitations.

**Which surgical procedure would you recommend?**

☐ Not a candidate for surgery
☐ Sleeve gastrectomy
☐ Roux-en-Y gastric bypass
☐ One-anastomosis gastric bypass
☐ Biliopancreatic diversion with duodenal switch
☐ SADI-S
☐ Intestinal transit bipartition
☐ Other (specify): _______________________

### **Case 8**

A 54-year-old man weighing 140 kg, height 1.74 m, BMI 46.2 kg/m², non-smoker, with type 2 diabetes mellitus of four years’ duration and obstructive sleep apnea treated with CPAP. He seeks weight loss and improvement of sleep apnea. He has no contraindications or financial limitations.

**Which surgical procedure would you recommend?**

☐ Not a candidate for surgery
☐ Sleeve gastrectomy
☐ Roux-en-Y gastric bypass
☐ One-anastomosis gastric bypass
☐ Biliopancreatic diversion with duodenal switch
☐ SADI-S
☐ Intestinal transit bipartition
☐ Other (specify): _______________________

### **Case 9**

A 20-year-old man weighing 190 kg, height 1.85 m, BMI 55 kg/m², non-smoker, with bilateral gonarthrosis resulting in functional impairment and insulin resistance, without other comorbidities. He has no contraindications or financial limitations.

**Which surgical procedure would you recommend?**

☐ Not a candidate for surgery
☐ Sleeve gastrectomy
☐ Roux-en-Y gastric bypass
☐ One-anastomosis gastric bypass
☐ Biliopancreatic diversion with duodenal switch
☐ SADI-S
☐ Intestinal transit bipartition
☐ Other (specify): _______________________

### **Case 10**

A 45-year-old woman weighing 95 kg, height 1.60 m, BMI 37.1 kg/m², non-smoker, with prediabetes and no other comorbidities. She understands and accepts postoperative requirements and has no contraindications or financial limitations.

**Which surgical procedure would you recommend?**

☐ Not a candidate for surgery
☐ Sleeve gastrectomy
☐ Roux-en-Y gastric bypass
☐ One-anastomosis gastric bypass
☐ Biliopancreatic diversion with duodenal switch
☐ SADI-S
☐ Intestinal transit bipartition
☐ Other (specify): _______________________
